# Supplementary material
Source: PubMed Central journal article supplement (PMC6927218)
Supplement: DS_10.1177_0022034519884012.pdf [file DS_10.1177_0022034519884012.pdf]

**Periodontal Antibodies and All-Cause and Cardiovascular Disease Mortality**  
 J. Qi, Z. Zihang, J. Zhang, Y.M. Park, D. Shrestha, B. Jianling, and A.T. Merchant

**Appendix**

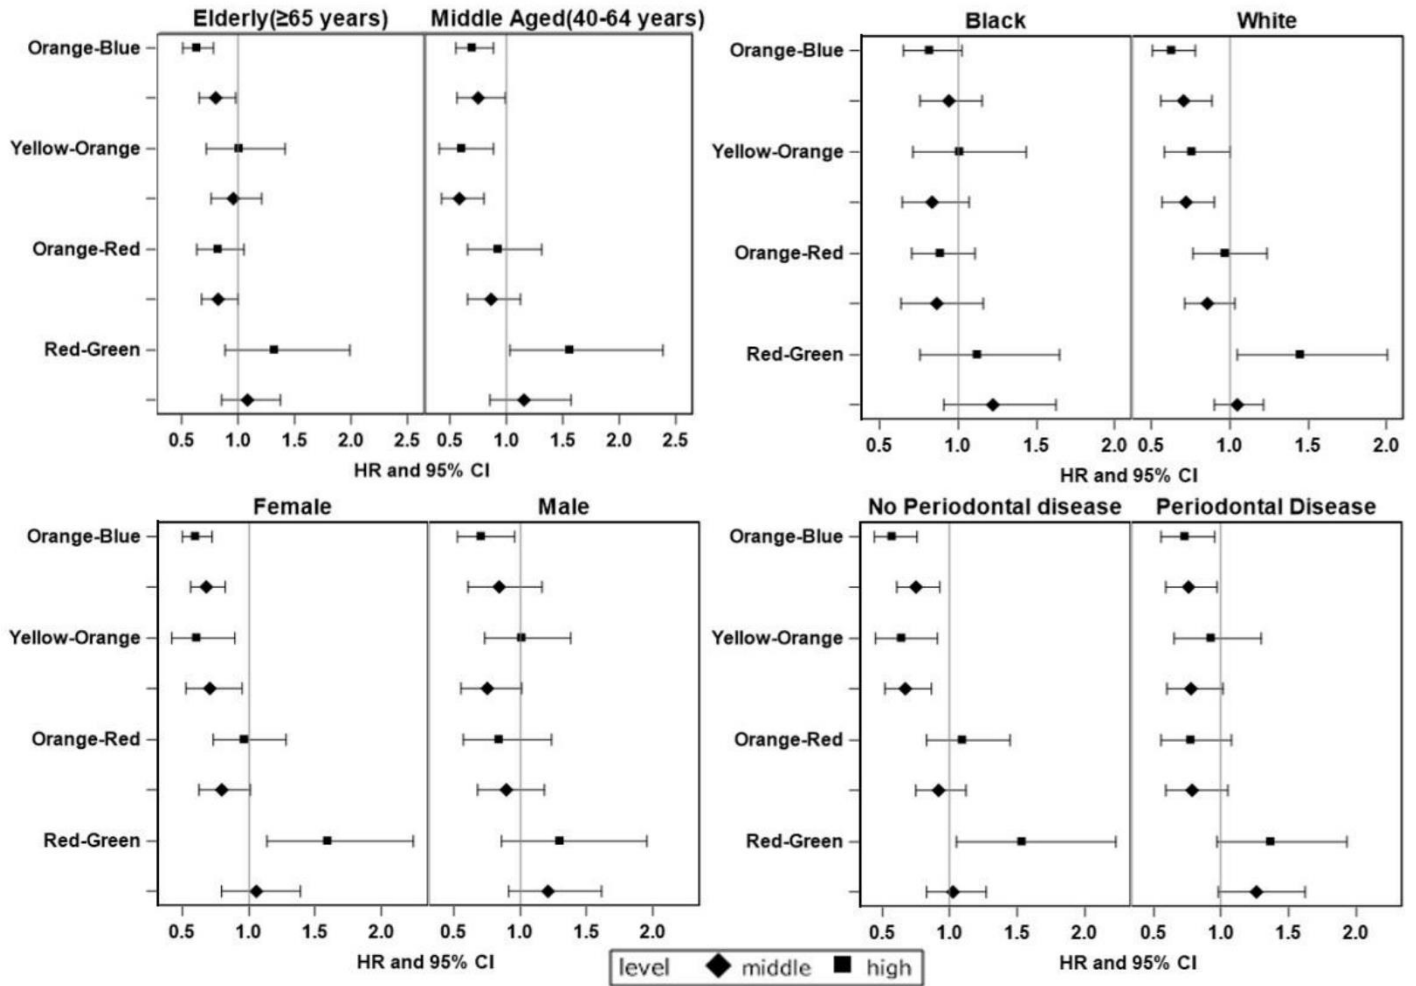

**Appendix Figure 1.** Hazard Ratios (95% CIs) of All-Cause Mortality According to Tertiles of Four Cluster Scores for Age, Race, Gender, and Periodontal Status Subgroups. (CI = Confidence Interval, HR = Hazard Ratio)

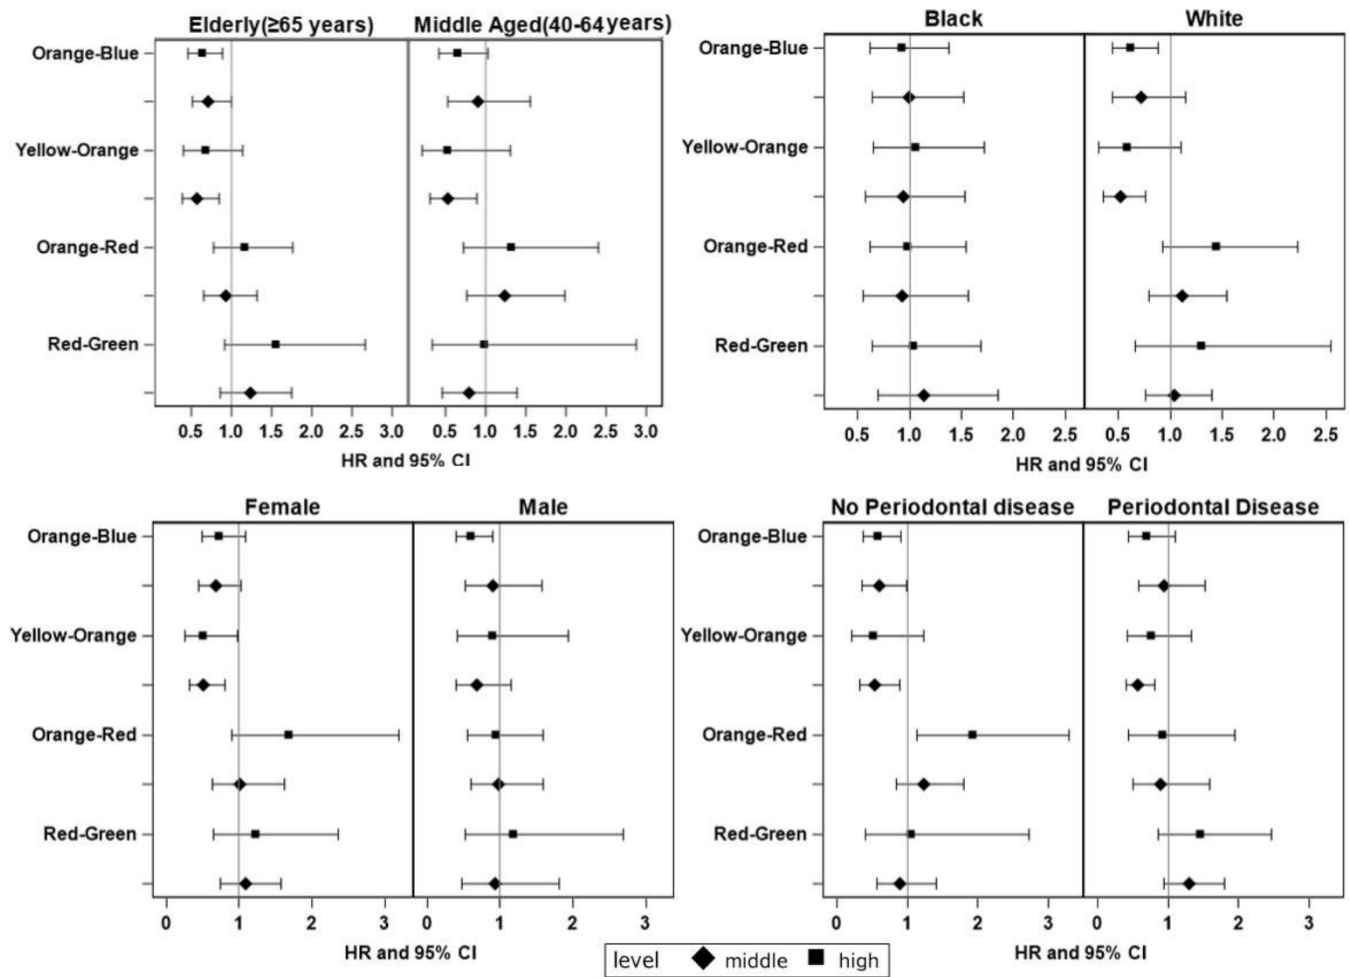

**Appendix Figure 2.** Hazard Ratios (95% CIs) of Cardiovascular Disease Mortality According to Tertiles of Four Cluster Scores for Age, Race, Gender, and Periodontal Status Subgroups. (CI = Confidence Interval, HR = Hazard Ratio)
